# Supplementary material for: Photocatalyzed dimethylacrylamide polymerization in an aqueous solution using 4-nitrophenylacetylene-modified Cu2O crystals
Source: Royal Society of Chemistry journal article supplement (doi:10.1039/d4ta01267d), 2024-01-01
Supplement: d4ta01267d1.pdf [file d4ta01267d1.pdf]

Electronic Supplementary Information

**Photocatalyzed dimethylacrylamide polymerization in aqueous solution using 4-nitrophenylacetylene-modified Cu<sub>2</sub>O crystals**

Yu-Chien Chen,<sup>a</sup> Xing-Fu Huang,<sup>b</sup> Huei-Ting Hsu,<sup>b</sup> Er-Ting Wu,<sup>b</sup> Chi-How Peng<sup>\*a</sup> and Michael H. Huang<sup>\*b</sup>

<sup>a</sup> Department of Chemistry, National Taiwan University, Taipei 106319, Taiwan

<sup>b</sup> Department of Chemistry, National Tsing Hua University, Hsinchu 300044, Taiwan

**Synthesis of Cu<sub>2</sub>O crystals**

To synthesize cubes and octahedra, 35.68 and 23.60 mL of deionized water were respectively introduced into two sample vials containing 0.348 g of sodium dodecyl sulfate (SDS) surfactant. The surfactant solutions were kept in a 31 °C water bath with vigorous stirring. Next, 2.0 and 0.8 mL of 0.1 M CuCl<sub>2</sub> solution was added into the vials respectively for cubes and octahedra and stirred for 10 min. Next, 0.72 mL and 0.8 mL of 1.0 M NaOH solution were added to the vials for cubes and octahedra, respectively. The color of the solution would change from colorless to light blue with the formation Cu(OH)<sub>2</sub>. After stirring for 4 sec, 1.6 mL of 0.1 M NH<sub>2</sub>OH·HCl and 5.2 mL of 0.1 M NH<sub>2</sub>OH·HCl solutions were injected into the vials respectively and stirred for 10 sec. Then the solutions were aged for 50 and 25 min, respectively.

To synthesize rhombic dodecahedral cuprous oxide, 27.68 mL of deionized water was introduced into the sample vial containing 0.348 g of SDS surfactant. The solution was kept in a 31 °C water bath with vigorous stirring. Then 2 mL of 0.1 M CuCl<sub>2</sub> solution was added into the vial. Next, 0.72 mL of 1.0 M NaOH solution was added. After stirring for 4 sec, 9.6 mL of 0.1 M NH<sub>2</sub>OH·HCl solution was introduced and stirred for 20 sec. Finally, the solution was aged for 50 min.

When the reaction time is over, the solutions were centrifuged at 9000 rpm for 10 min using a Universal 320R centrifuge, and washed with 1:1 volume ratio of water and ethanol for 3 times to remove unreacted chemicals and the SDS surfactant, and finally washed with absolute ethanol. After washing, the particles were stored in absolute ethanol.

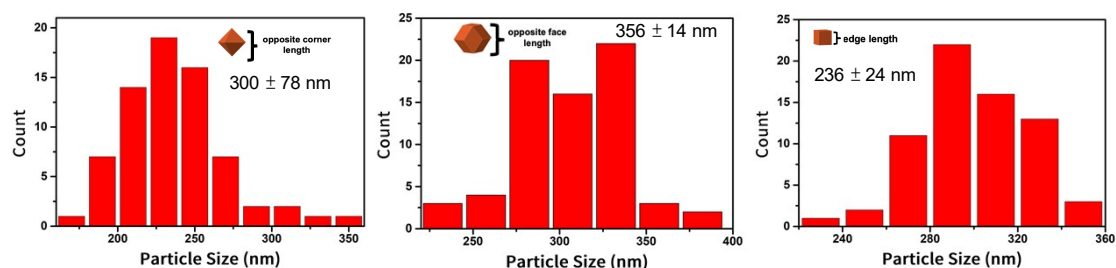

**Fig. S1** Size distribution histograms of the synthesized Cu<sub>2</sub>O crystals.

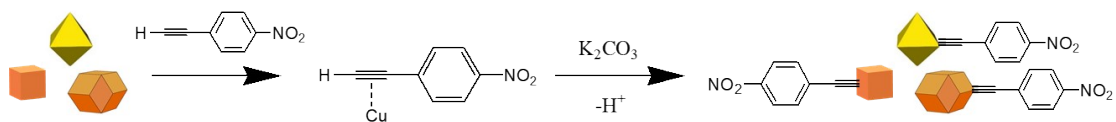

**Fig. S2** Illustration of 4-NA modification on  $\text{Cu}_2\text{O}$  crystals.

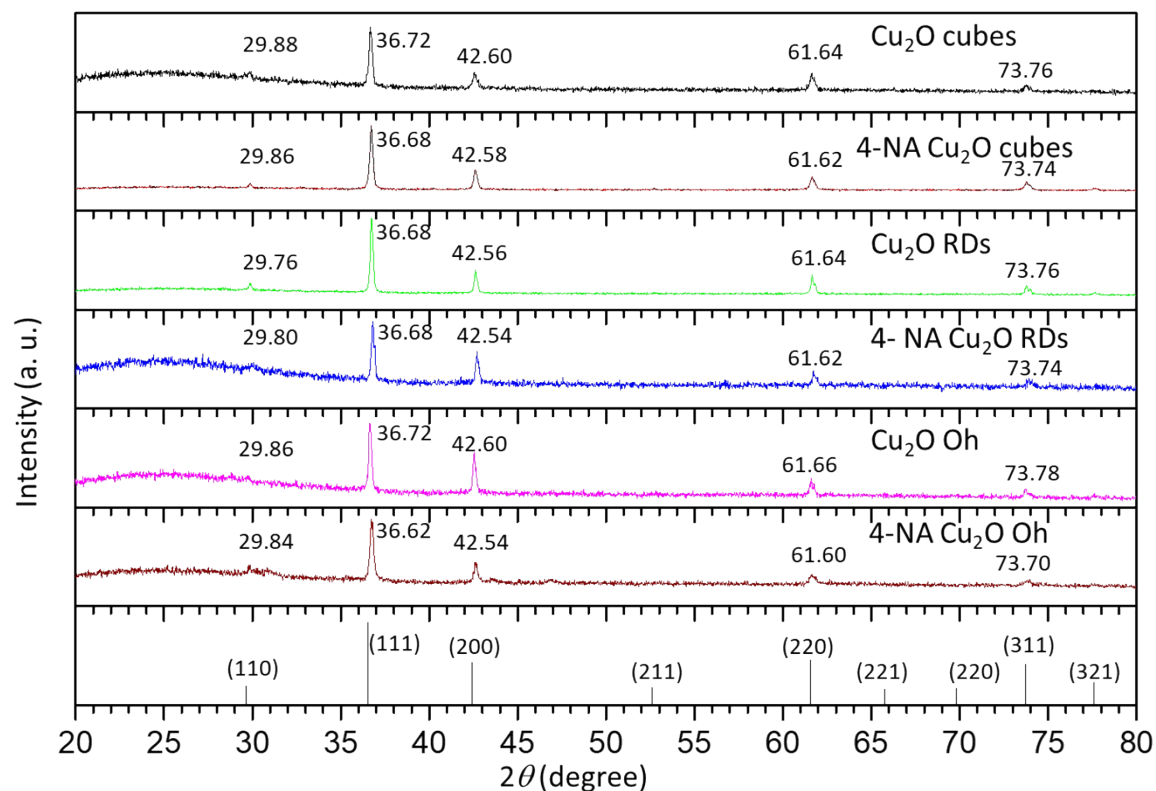

**Fig. S3** XRD patterns of the pristine  $\text{Cu}_2\text{O}$  and 4-NA-modified  $\text{Cu}_2\text{O}$  crystals. A standard pattern of  $\text{Cu}_2\text{O}$  is included.

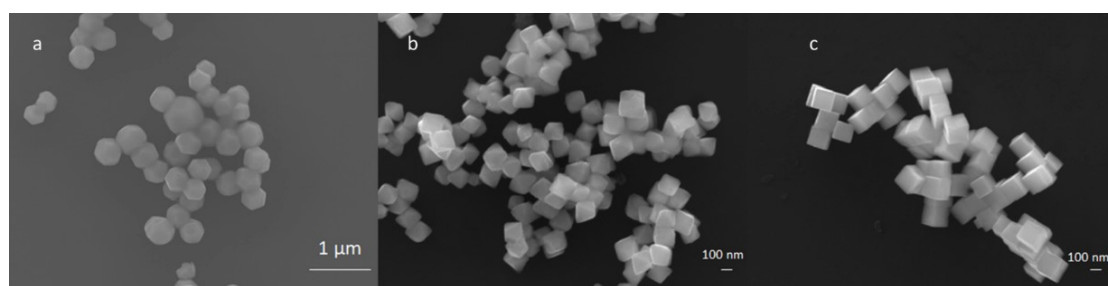

**Fig. S4** SEM images of the 4-NA-functionalized  $\text{Cu}_2\text{O}$  (a) rhombic dodecahedra, (b) octahedra, and (c) cubes.

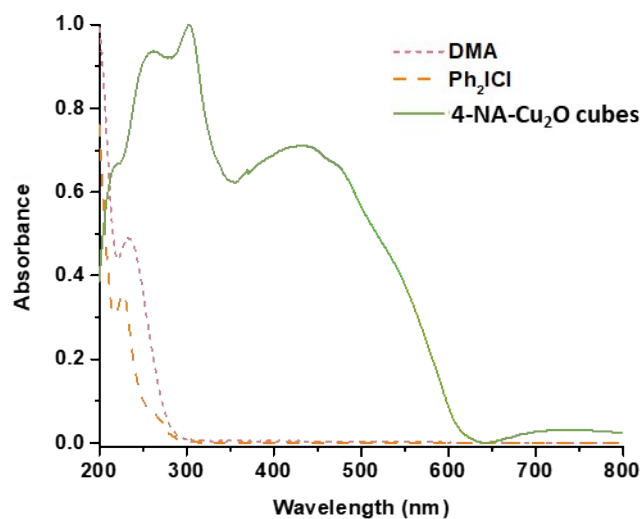

**Fig. S5** UV-vis absorption spectra of DMA,  $\text{Ph}_2\text{ICI}$ , and 4-NA-modified  $\text{Cu}_2\text{O}$  cubes.

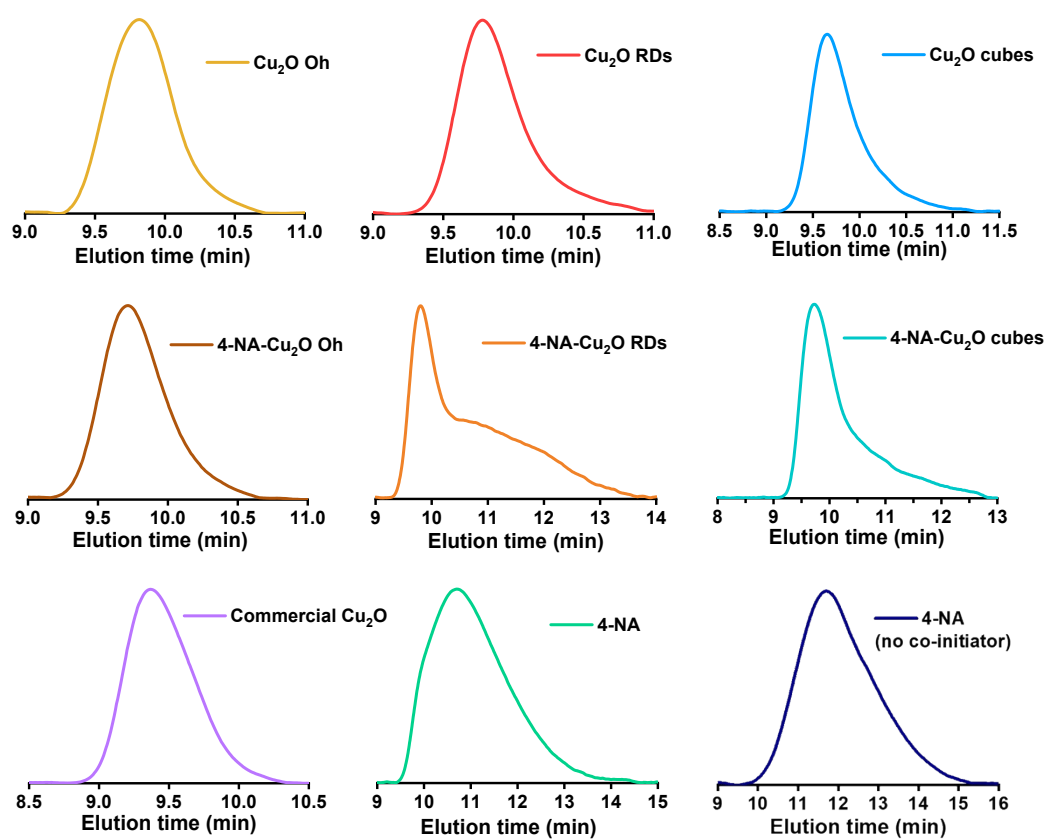

**Fig. S6** GPC chromatograms of the produced PDMA using different  $\text{Cu}_2\text{O}$  photocatalysts.

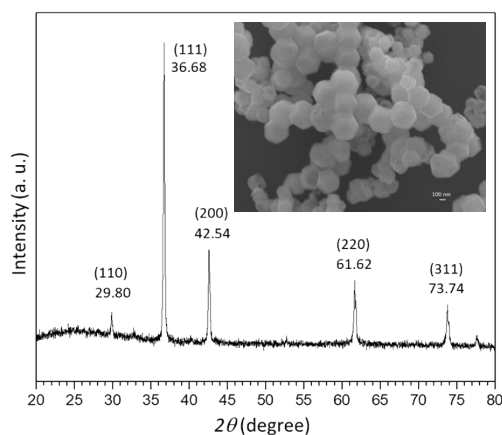

**Fig. S7** XRD pattern and SEM image of 4-NA-modified Cu<sub>2</sub>O rhombic dodecahedra after the polymerization reaction.

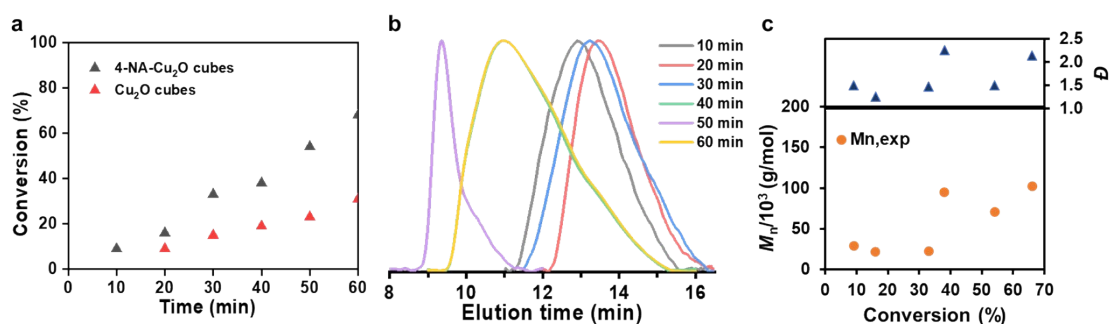

**Fig. S8** (a) Extent of DMA conversion versus the reaction time using pristine and 4-NA-modified Cu<sub>2</sub>O cubes as the photocatalysts with light irradiation from 420 nm mercury lamps. (b) GPC chromatograms of the produced PDMA using 4-NA-modified Cu<sub>2</sub>O cubes. (c) Evolution of  $M_n$  and  $D$  versus monomer conversion using 4-NA-modified Cu<sub>2</sub>O cubes from the reaction in (a).

**Table S1** Conditions used for the scavenger experiment

| Catalyst                            | DI water | Monomer    | Co-initiator                 | Scavenger                                                                | Time | Conversion  |
|-------------------------------------|----------|------------|------------------------------|--------------------------------------------------------------------------|------|-------------|
| 4-NA-Cu <sub>2</sub> O cubes 5.3 mg | 1 mL     | DMA<br>1 g | Ph <sub>2</sub> ICl<br>15 mg | benzoquinone<br>(e <sup>-</sup> ) 30 mg                                  | 1 h  | no reaction |
| 4-NA-Cu <sub>2</sub> O cubes 4.8 mg | 1 mL     | DMA<br>1 g | Ph <sub>2</sub> ICl<br>15 mg | Na <sub>2</sub> C <sub>2</sub> O <sub>4</sub> (h <sup>+</sup> )<br>30 mg | 1 h  | 55%         |

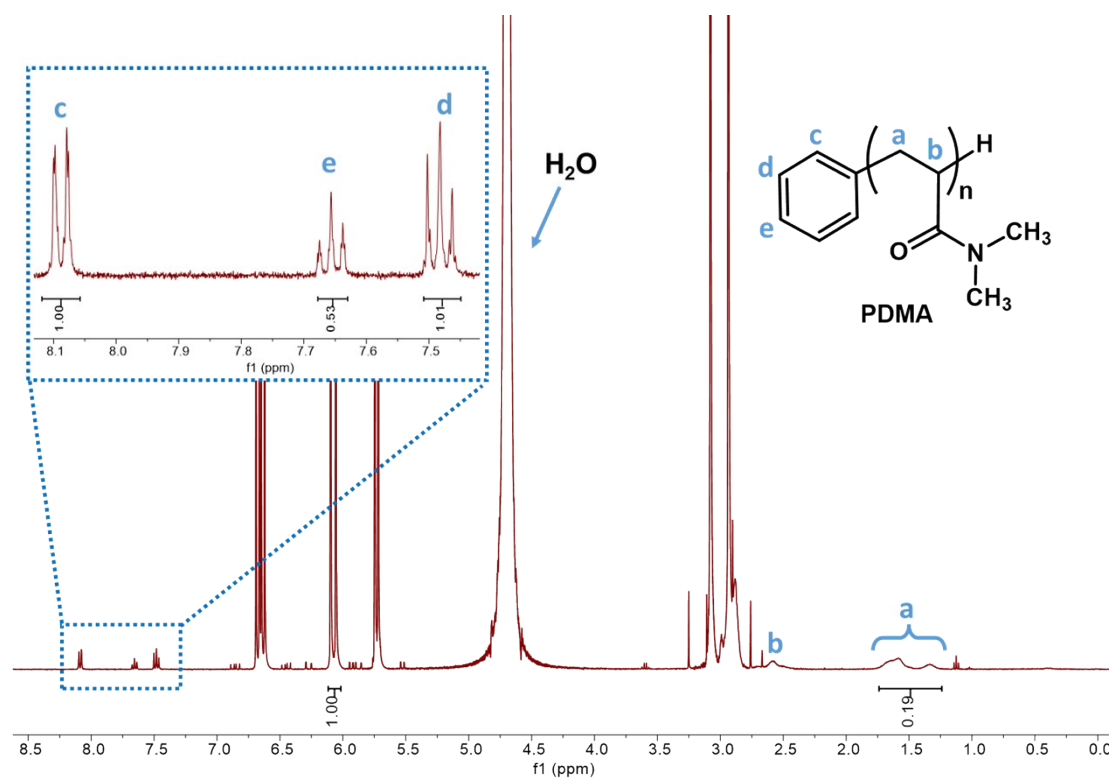

**Fig. S9**  $^1\text{H-NMR}$  spectrum of the sample for MALDI-TOF mass spectrometry analysis.

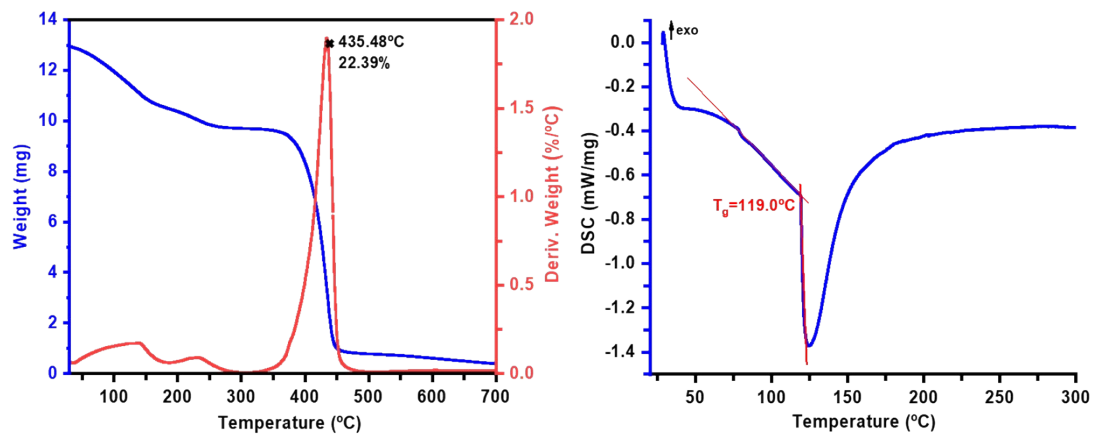

**Fig. S10** Thermogravimetric analysis and differential scanning calorimetry of the synthesized PDMA.

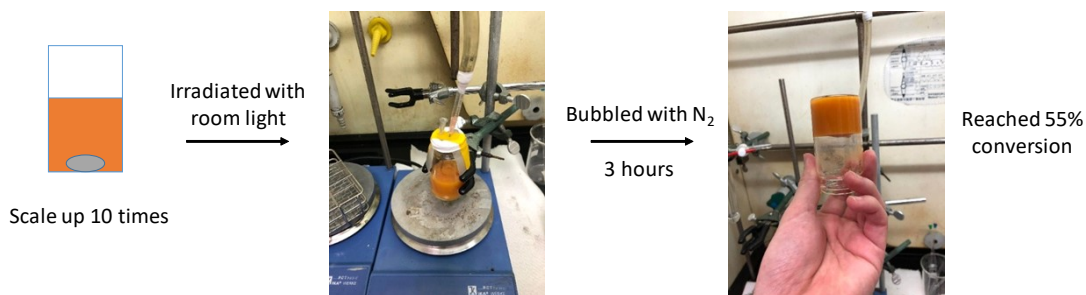

**Fig. S11** Scaled up photopolymerization process using 4-NA-modified  $\text{Cu}_2\text{O}$  cubes as the catalyst.

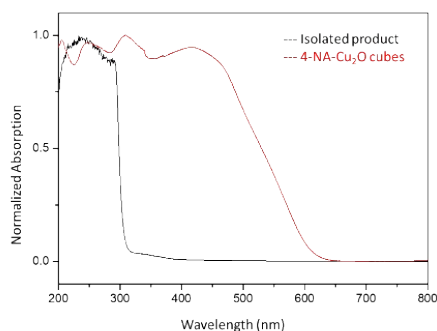

**Fig. S12** UV-vis absorption spectra of the isolated polymer and 4-NA-modified  $\text{Cu}_2\text{O}$  cubes. The polymer is clearly separated from the orange-colored  $\text{Cu}_2\text{O}$  crystals.

monomer.1.fid

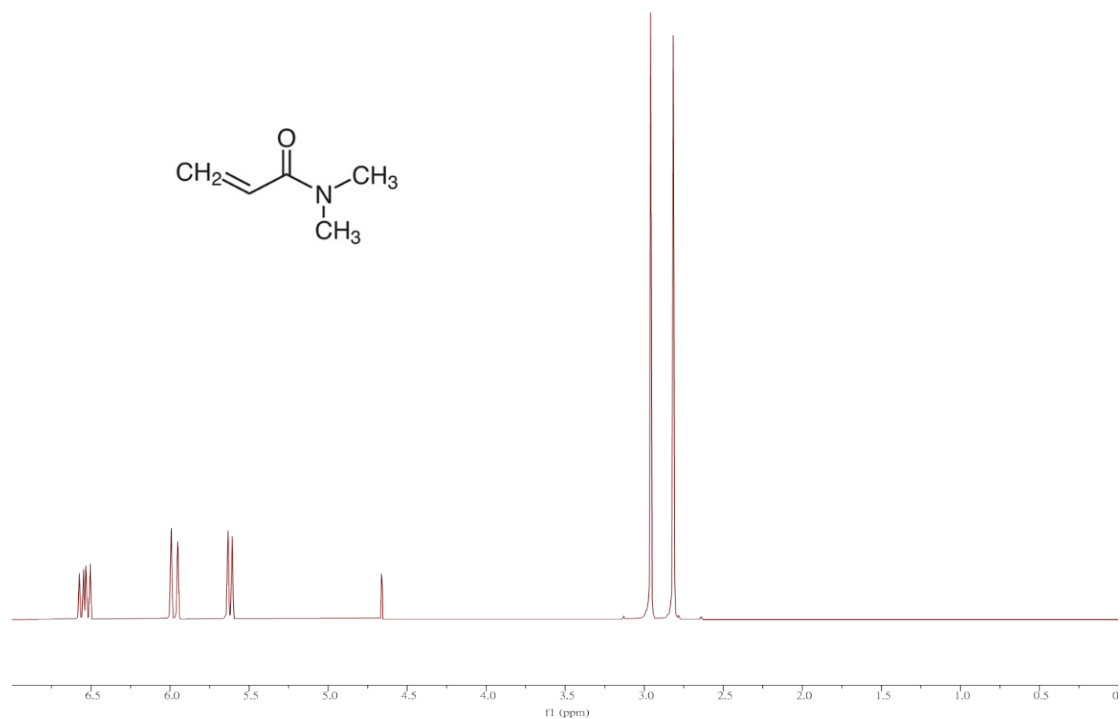

**Spectrum S1**  $^1\text{H}$ -NMR spectrum of the DMA monomer.

Ph2ICl.1.fid

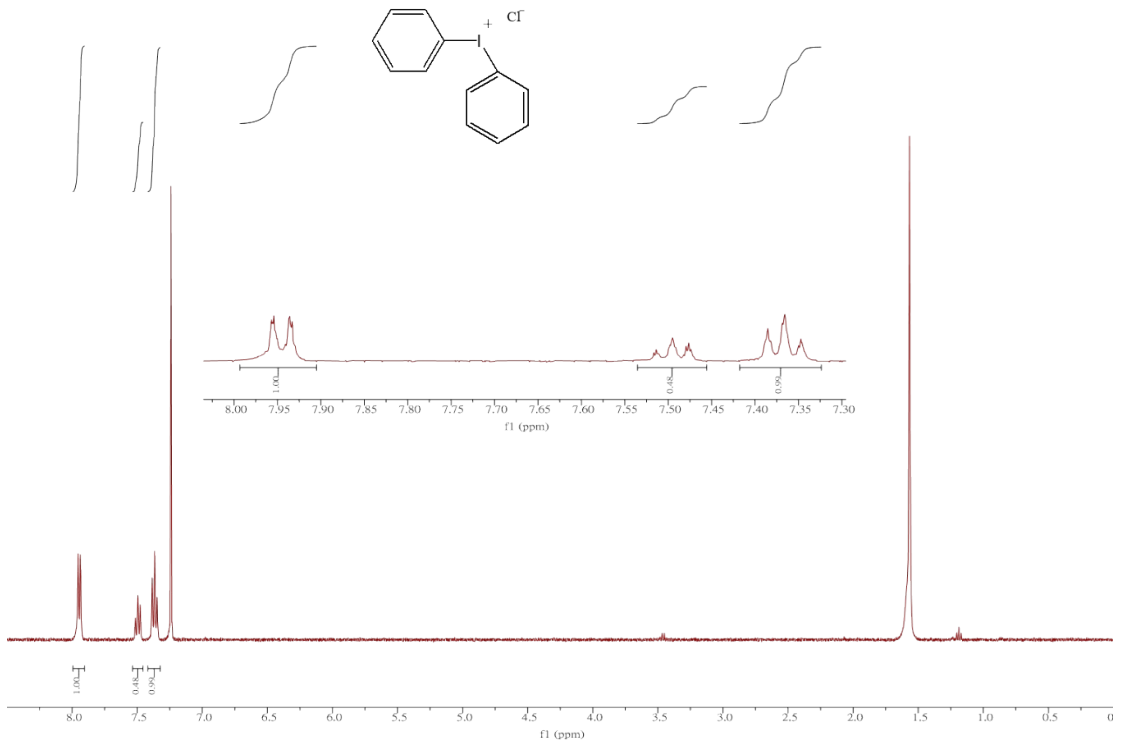

**Spectrum S2** <sup>1</sup>H-NMR spectrum of the Ph<sub>2</sub>ICl co-initiator.

YCC11-Cu2O Oh.1.fid  
Cu2O-Oh

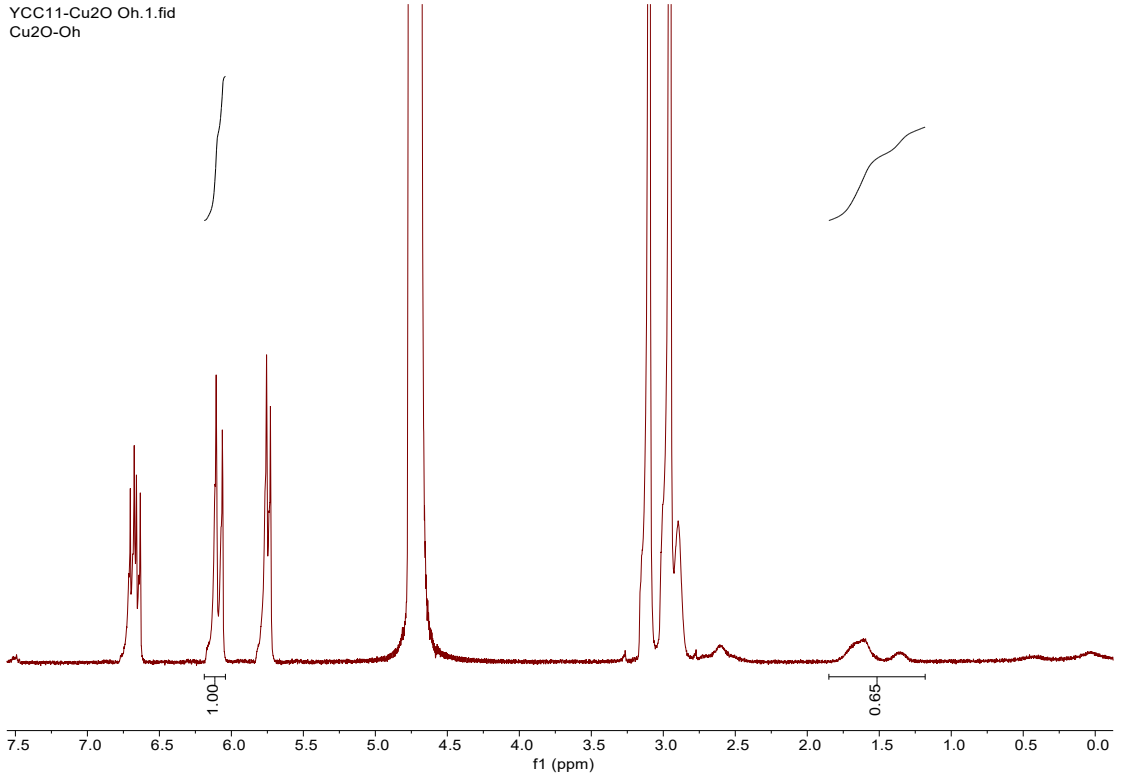

**Spectrum S3** <sup>1</sup>H-NMR spectrum of DMA polymerization using Cu<sub>2</sub>O octahedra as the photocatalyst.

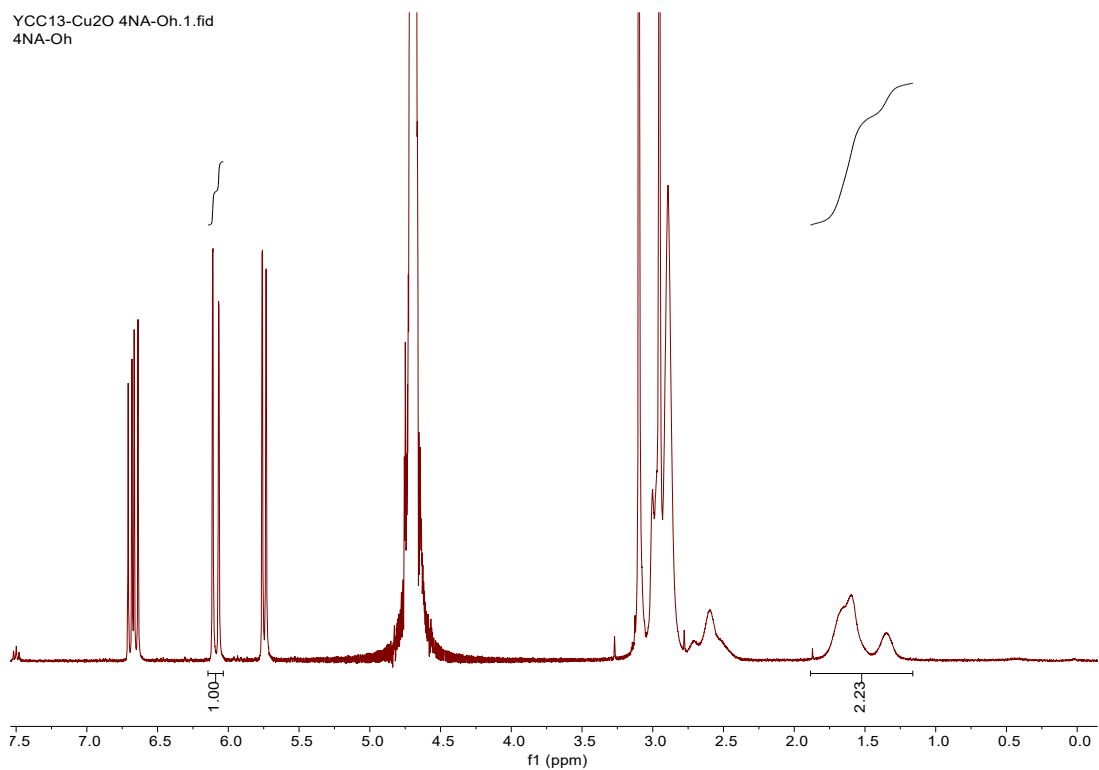

**Spectrum S4**  $^1\text{H}$ -NMR spectrum of DMA polymerization using 4-NA-modified  $\text{Cu}_2\text{O}$  octahedra as the photocatalyst.

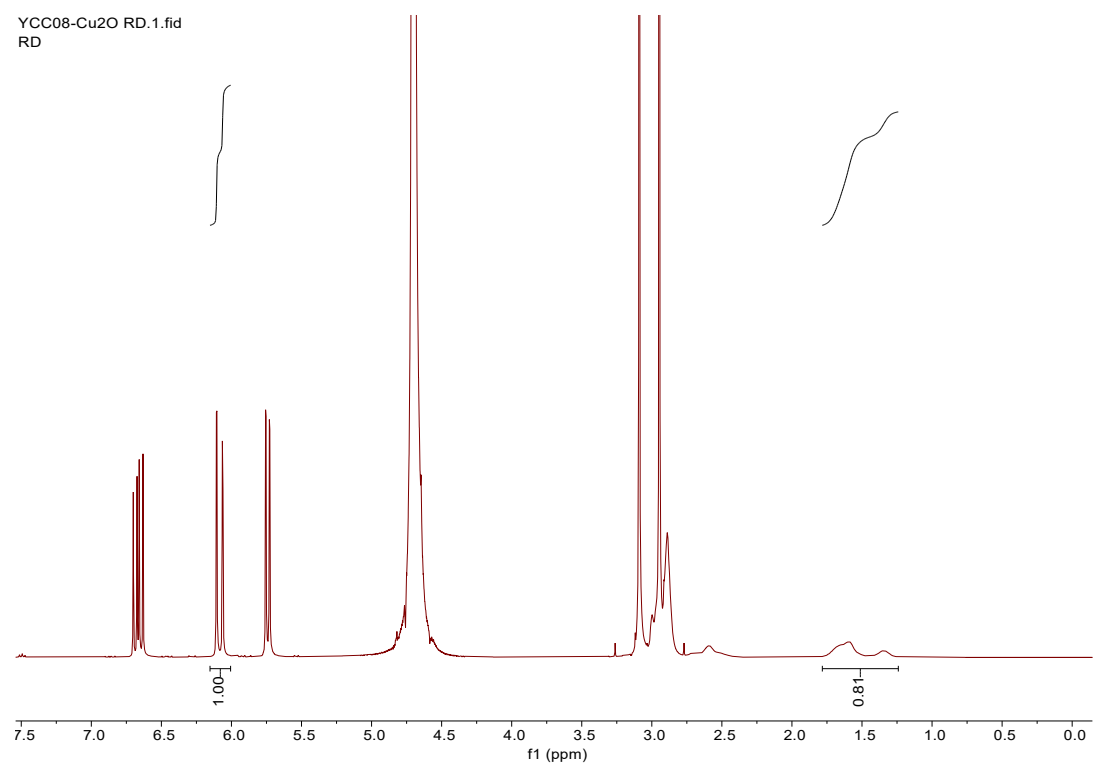

**Spectrum S5**  $^1\text{H}$ -NMR spectrum of DMA polymerization using  $\text{Cu}_2\text{O}$  rhombic dodecahedra as the photocatalyst.



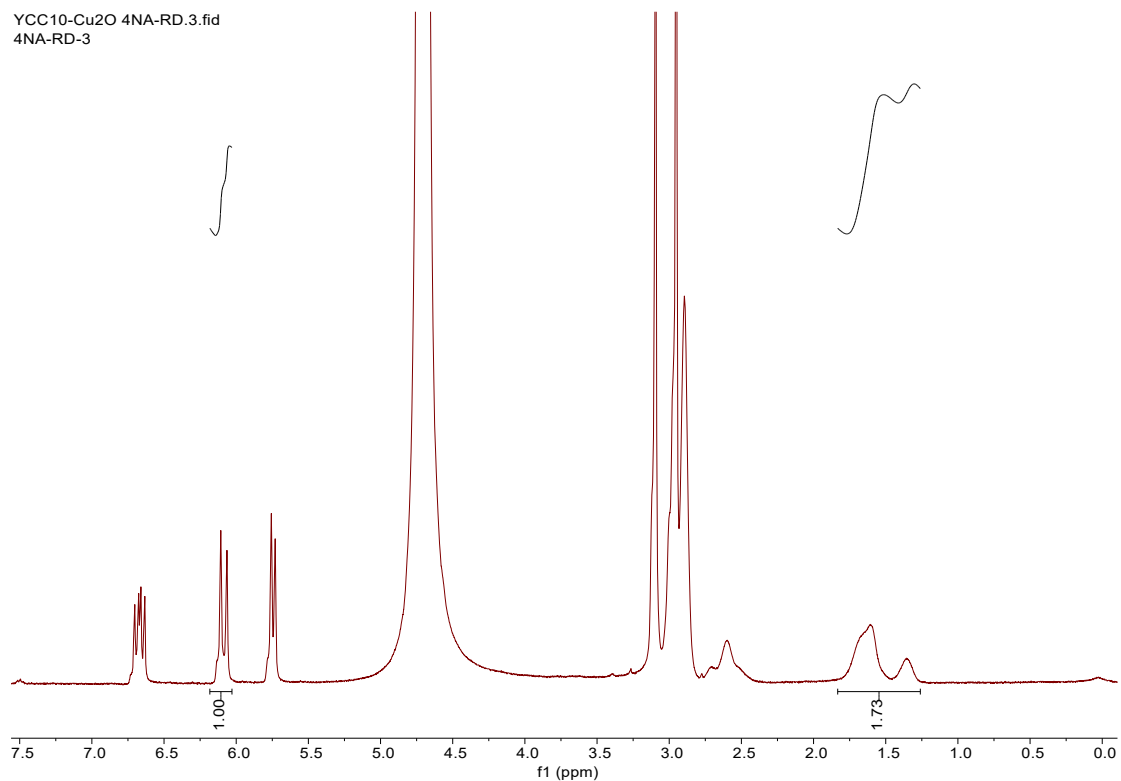

**Spectrum S6**  $^1\text{H}$ -NMR spectrum of DMA polymerization using 4-NA-modified  $\text{Cu}_2\text{O}$  rhombic dodecahedra as the photocatalyst.

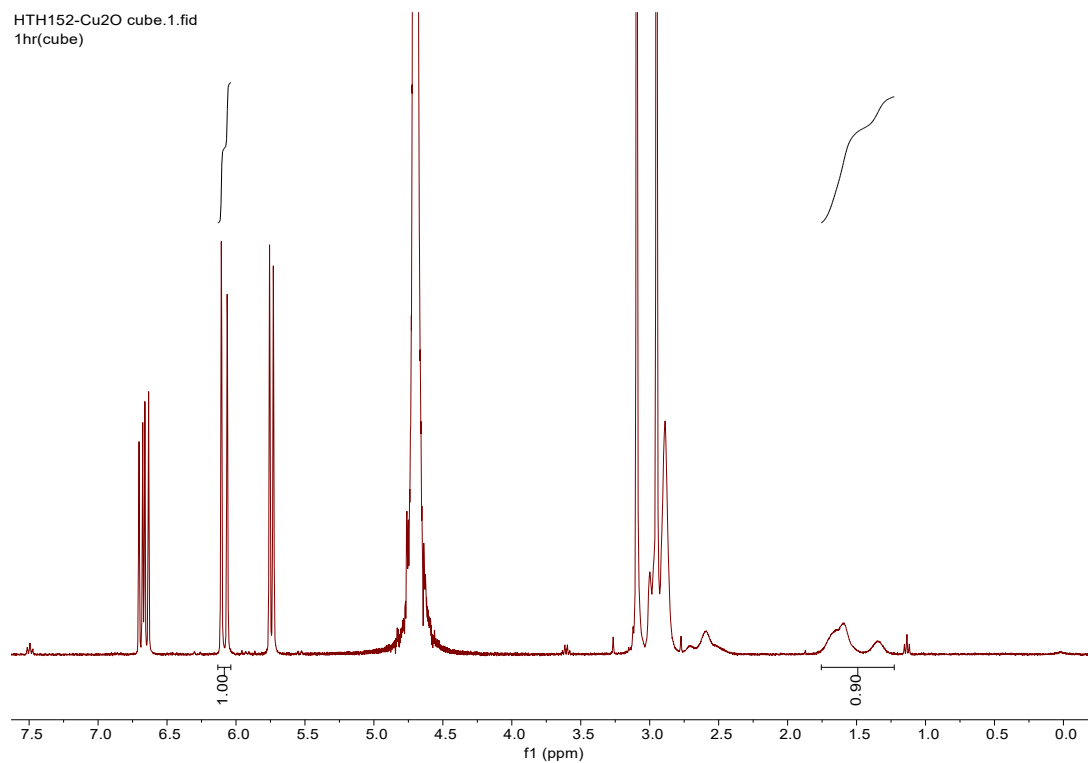

**Spectrum S7**  $^1\text{H}$ -NMR spectrum of DMA polymerization using  $\text{Cu}_2\text{O}$  cubes as the photocatalyst.

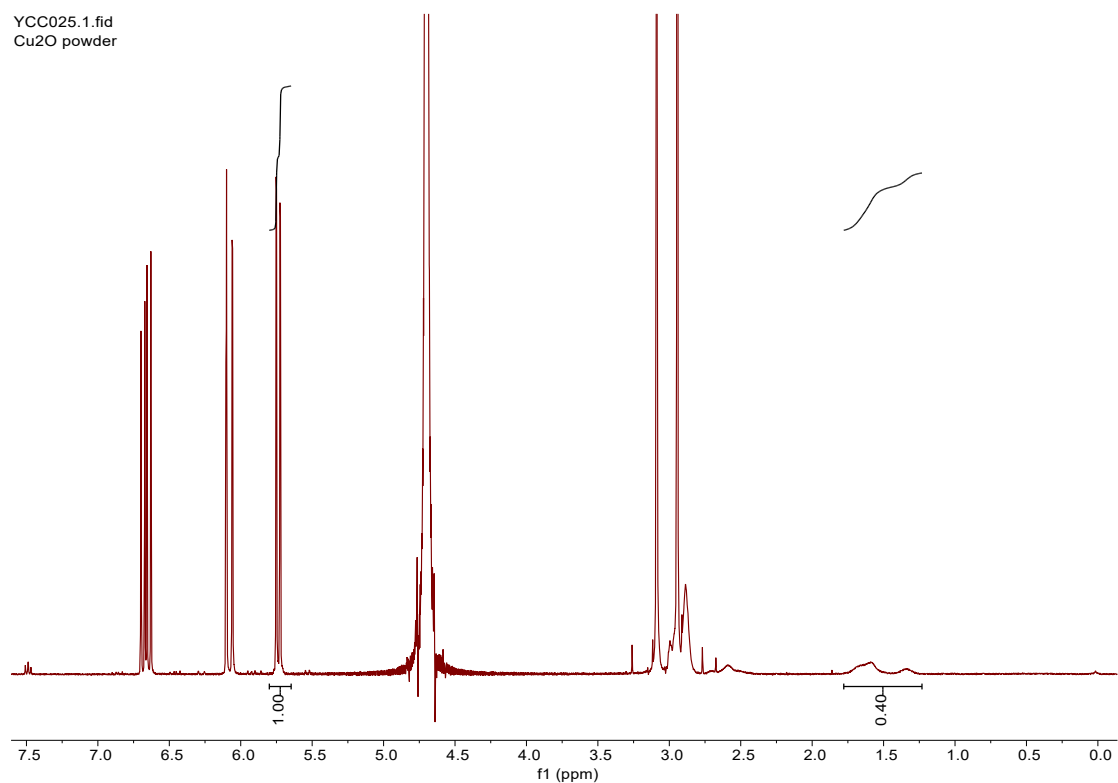

**Spectrum S8** <sup>1</sup>H-NMR spectrum of DMA polymerization using commercial Cu<sub>2</sub>O powder as the photocatalyst.

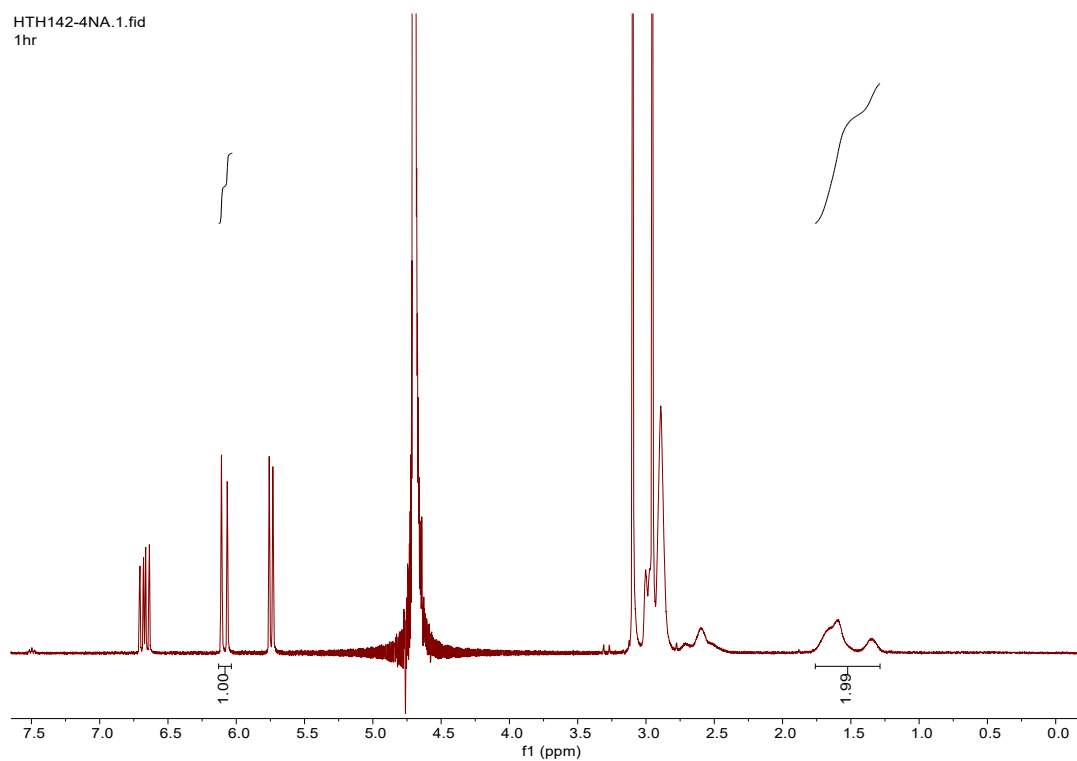

**Spectrum S9** <sup>1</sup>H-NMR spectrum of DMA polymerization in the presence of free 4-nitrophenylacetylene.

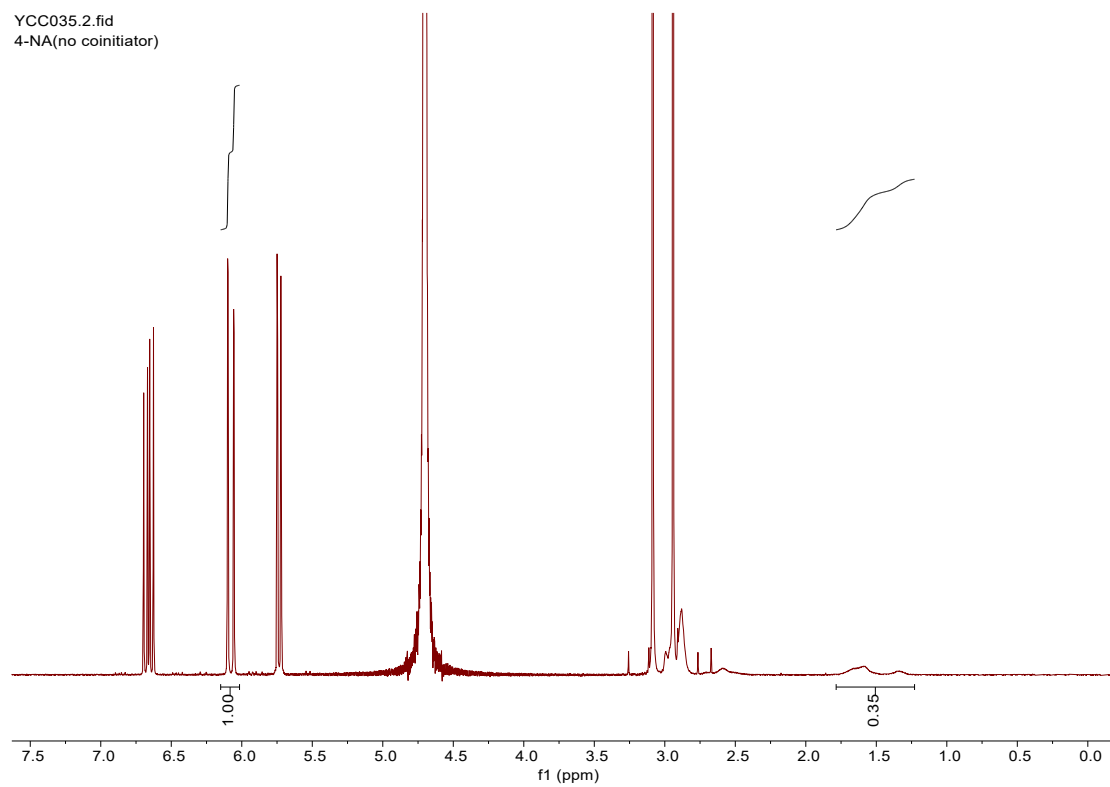

**Spectrum S10**  $^1\text{H}$ -NMR spectrum of DMA polymerization in the presence of 4-NA only without  $\text{Ph}_2\text{ICl}$ .
